# Supplementary material for: Hierarchically macro/mesostructured porous copper oxide: facile synthesis, characterization, catalytic performance and electrochemical study of mesoporous copper oxide monoliths
Source: Royal Society of Chemistry journal article supplement (doi:10.1039/c3ta14977c), 2014-01-01
Supplement: c3ta14977c3.pdf [file c3ta14977c3.pdf]

Expression of Concern for *Journal of Materials Chemistry A*

**Hierarchically macro/mesostructured porous copper oxide: Facile synthesis, Characterization, Catalytic performance and Electrochemical study of mesoporous copper oxide monoliths**

Gowhar Ahmad, Riyaz Ahmad Dar and Farid Khan, *J. Mater. Chem. A*, 2014, **2**, Accepted Manuscript (DOI: 10.1039/C3TA14977C)

This article has been published in *Journal of Materials Chemistry A* as a Just Accepted Manuscript and reports the synthesis of hierarchically macro/meso structured porous copper-oxide monoliths, which show catalytic activity towards the wet oxidation of phenol and electrocatalytic performance of mesoporous copper oxide (mpCuO) against p-nitrophenol.

*Journal of Materials Chemistry A* is publishing this Expression of Concern in order to alert our readers to the fact that we have received significant concerns from members of the community regarding the data presented in this article shown in Figure 1, Figure 2, Figure 5 and Figure 6. Significant concerns have been raised over the possible fabrication of the data presented in these figures.

In response to our inquiries, the institution of the corresponding author has been requested to carry out an investigation. This Expression of Concern will continue to be associated with the article until the investigation into this matter has been concluded.

Liz Dunn

27<sup>th</sup> March 2014

Executive Editor, *Journal of Materials Chemistry A*
